# Supplementary material for: Diverse Microbial Community Profiles of Propionate-Degrading Cultures Derived from Different Sludge Sources of Anaerobic Wastewater Treatment Plants
Source: Microorganisms. 2020 Feb 18;8(2):277. doi: 10.3390/microorganisms8020277 (PMC7074800; doi:10.3390/microorganisms8020277)
Supplement: Supplementary file 1 [file microorganisms-08-00277-s001.xlsx]

## Sheet: Table S1
	Table S1: Alpha-diversity estimation of microbiome in inoculums and their corresponding propionate-degrading cultures.
	Sample Name	Stage	Good's coverage	Observed OTUs	Richness (Chao1)
	Domestic.S	Inoculum	0.9809	2160	2766.18
	FruitJuice.S	Inoculum	0.9879	2085	2700.41
	PalmOil.S	Inoculum	0.9845	1220	1869.41
	PigManure.S	Inoculum	0.9862	1960	2811.46
	Seafood.S	Inoculum	0.984	1172	1567.97
	Starch.S	Inoculum	0.99	1815	2599.41
	Domestic.E	Enriched culture	0.9888	1981	2652.36
	FruitJuice.E	Enriched culture	0.9872	1902	2460.98
	PalmOil.E	Enriched culture	0.9818	1151	1698.48
	PigManure.E	Enriched culture	0.9915	1411	2194.91
	Seafood.E	Enriched culture	0.9935	1050	1495.17
	Starch.S	Enriched culture	0.9912	1485	2133.23
	The sample were originally derived from different anaerobic sludge of wastewater treatment plants, which are domestic wastewater (Domestic), fruit juice-processing
	wastewater (FruitJuice), palm oil mill effluent (PalmOil), pig manure waste (PigManure) seafood-processing wastewater (Seafood) and starch-processing wastewater (Starch).
	Note: Raw sequencing reads of inoculum and enriched cultures were derived at the average of 86,187 paired-end reads per sample. 68.68% of the sequences were qualified as high qualities and used for downstream analysis. Good’s coverages of all samples range from 0.9840 to 0.9940 indicating a small number of singletons in the studied samples. 99.97% of total qualified contigs could be assigned taxo…

## Sheet: Table S2
	Table S2: Statistical comparison of microbial profile between stages of inoculum and enriched culture using Analysis of Similarity (ANOSIM)
	Inoculum vs Enriched culture	R-value	P-value
	with seafood samples (6 samples in each stage)	0.188889	0.044
	without seafood samples (5 samples in each stage)	0.468	0.01

## Sheet: Table S3
	Table S3: Statistical comparison of microbial profiles among different sources of anaerobic sludge using Analysis of Similarity (ANOSIM)
	Group of comparison	R-value	P-value
	Domestic vs Others	0.134783	0.298
	FruitJuice vs Others	-0.20652	0.799
	Starch vs Others	-0.19783	0.768
	Seafood vs Others	0.965217	0.018
	PigManure vs Others	-0.10435	0.575
	PalmOil vs Others	0.065217	0.391

## Sheet: Table S4
	Table S4: Relative abundance of 87 dominant OTUs (relative abundance greater than 1% in at least one sample) in our studied samples.
		Inoculum						Enriched culture
	otu|tax	Domestic	FruitJuice	PalmOil	PigManure	Starch	Seafood	Domestic	FruitJuice	PalmOil	PigManure	Starch	Seafood
	OTU00001 | Methanosaeta	5.83794	4.8891	0.106534	19.1622	7.03954	1.10938	15.4565	9.89705	5.88948	37.9902	21.4137	2.43246
	OTU00002 | Smithella	3.1167	5.53021	6.51042	6.82417	4.03563	0.501099	2.82524	8.30191	23.8745	25.5836	18.4944	0.601283
	OTU00003 | Methanosaeta	0.912611	7.51682	7.74444	1.70743	2.71179	4.82609	8.21273	3.6956	3.89617	0.280999	5.21266	0.598406
	OTU00004 | uncultured_Anaerolineaceae(F)	0.149336	0.874242	2.73142	0.44913	1.88244	11.6794	0.0738223	0.697639	1.60803	0.133403	0.956532	18.4715
	OTU00005 | Peptoclostridium	2.02434	9.80983	11.994	4.84392	12.9733	0.971381	0.309131	0.669357	0.276748	0.127727	0.197449	0.0575391
	OTU00006 | Syner-01	0.152102	0.22647	0.991359	2.7189	1.34521	10.4212	0.565971	8.41504	1.26798	1.81372	0.656702	6.0229
	OTU00007 | Thermovirga	0	0.00499567	0.0118371	0.0148473	0.0228001	0.933866	0.42294	1.69885	1.86669	0.310801	0.649389	22.7236
	OTU00008 | uncultured_Synergistaceae(F)	0	0.129887	0.150923	0	0.131101	19.9153	0.00153796	0.0377102	0.0506466	0.00567674	0.0117007	0.838632
	OTU00009 | uncultured_Anaerolineae(C)	0.0138274	0.344701	0	0.543781	8.56573	0.150062	0.262992	0.850366	0.213439	0.232746	8.08518	0.176933
	OTU00010 | Acidaminobacter	0.674779	0.985812	1.84067	2.21039	12.0314	0.352377	0.198397	0.339392	0.132043	0.10502	0.465103	0.0676084
	OTU00011 | Syntrophomonas	0.522677	0.754346	0.0177557	0.0129914	0.0755255	0.0227772	6.75013	7.38366	0.162793	0.0667017	1.35874	0.033085
	OTU00012 | Syntrophomonas	0.102323	0.00166522	1.51219	0.430571	0.0270752	0.08173	4.63081	4.35365	2.93208	2.23238	0.190136	0.0719238
	OTU00013 | JGI-0000079-D21	0.284845	7.44188	0.0147964	0.0352622	0.75098	1.11206	0.00153796	3.99351	0.0108529	0.0212878	0.152109	1.08317
	OTU00014 | uncultured_Anaerolineaceae(F)	0.149336	0.409645	5.06037	1.01147	0.381902	0.142023	0.103044	0.128215	7.17916	0.378922	0.159422	0.0618545
	OTU00015 | Methanolinea	0.301438	1.17232	0.0621449	0.456553	3.6124	0.00937885	0.198397	0.126329	0.206204	0.245519	4.73293	0.00143848
	OTU00016 | Syntrophobacter	0.0691372	0.0216479	0.216027	0.111354	0.225151	0.0428748	0.258378	0.177238	0.479334	0.053929	0.269116	8.06266
	OTU00017 | JGI-0000079-D21	0.425885	1.07906	0.186435	0.415723	0.608479	3.03339	0.327586	1.90625	0.0397938	0.0823127	0.160885	2.09874
	OTU00018 | Methanolinea	0.829646	0.358023	4.44188	3.70254	0.102601	0.0174179	0.186094	0.122558	1.3349	2.04079	0.179898	0.00719238
	OTU00019 | Pseudomonas	0	0.128222	0.224905	0.00185591	0.106876	8.13682	0.00153796	0	0	0	0	0
	OTU00020 | Cryptanaerobacter	4.38053	0.309732	0.168679	0.230133	0	0	5.67048	0.944641	0.117573	0.00851511	0.00731294	0.00719238
	OTU00021 | unclassified_Parcubacteria(C)	0.00276549	0.00166522	0.177557	0.0167032	0.00570004	0.00133984	0.479845	0.00565654	8.67867	0.0255453	1.22857	0.00143848
	OTU00022 | Syntrophomonas	0.0553097	0	1.21035	0.246836	0.0228001	0.0455544	3.36353	1.18033	2.29538	1.47169	0.247177	0.0489082
	OTU00023 | Methanobacterium	0.0138274	0.761007	0	0.0185591	0.410403	0.0107187	0.725919	4.47809	0.0416026	0.300867	2.52296	0.00719238
	OTU00024 | unknown_Bacteroidetes_vadinHA17(F)	0.425885	0.474589	5.84162	0.35819	0.111151	0.0951284	0.921241	0.671242	2.34422	0.195847	0.0511905	0.0100693
	OTU00025 | Methanospirillum	0.00276549	0.00832612	0.130208	0.0111354	0.00427503	3.29064	0.24915	0.00754205	0.0198969	0.19159	0.00731294	2.6842
	OTU00026 | unknown_1-20(O)	4.43031	0.221475	0.168679	0.213429	0	0	3.60499	0	0.0958669	0.00141918	0.00292517	0.00143848
	OTU00027 | unknown_Aminicenantales(O)	0.160398	2.18644	0	0	0.101176	0.0468943	0.0476769	3.88227	0	0.022707	0.0482654	0.0258926
	OTU00028 | uncultured_Anaerolineae(C)	0.00553097	0.10824	0.00295928	0.213429	2.71607	0.065652	0.0553667	0.18478	0.0904404	0.107858	1.73755	0.0489082
	OTU00029 | DMER64	0	0	0.0384706	0	0	0.0120585	0	0.00377102	0	0.0113535	0.0117007	5.06056
	OTU00030 | unclassified_Anaerolineaceae(F)	0.11615	0.131553	0.316643	1.17108	1.43071	0.0428748	0.379877	0.207406	0.383467	0.689724	0.671327	0.0287695
	OTU00031 | uncultured_Actinomarinales(O)	0.353982	1.53367	0.0147964	0.115066	1.11578	0.0549333	0.999677	0.446866	0.07597	0.0468331	0.571872	0.0316465
	OTU00032 | unknown_Bacteroidetes_vadinHA17(F)	0.0525442	0.00166522	2.07741	0.0556772	0.00142501	0.0254569	0.0399871	0.0603364	4.11685	0.119212	0.0365647	0.00863086
	OTU00033 | unknown_Aminicenantales(O)	0.951327	0.607807	0.0266335	0.116922	0.595654	0.0174179	1.90246	0.55434	0.0452202	0.0283837	0.558708	0.0287695
	OTU00034 | Methanobacterium	0.00276549	0.00832612	0.073982	0.00185591	0	2.65422	0.00153796	0.262086	0.00723524	0	0.00146259	1.23421
	OTU00035 | unknown_DTU014(O)	0.110619	0.344701	0.00887784	0.105787	0.228001	0.00937885	0.18917	3.87096	0.0217057	0.0610249	0.310068	0.0345234
	OTU00036 | Methanoregula	0.738385	2.48784	0	0.257971	0.0741005	0.00267967	0.0599806	0.10936	0	1.13677	0.08483	0
	OTU00037 | Anaerobium	0.323562	0.211483	4.87985	0.48996	0.75383	0.24117	0.00615186	0.0188551	0.0198969	0	0.0131633	0.00287695
	OTU00038 | unknown_D8A-2(O)	0	0.00333045	0	0	0.00285002	0.200975	0.00153796	0.14707	0	0.0198686	0.0526531	3.51851
	OTU00039 | uncultured_Acidaminococcaceae(F)	0.224004	4.09478	0.0147964	0.0222709	0.133951	0.0589528	0	0.00377102	0.00180881	0	0	0.00431543
	OTU00040 | unclassified_Desulfobacteraceae(F)	0	0.00166522	0.00295928	0	0.00142501	0.0267967	0	0.077306	0	0.0255453	0.0482654	3.62928
	OTU00041 | Methanosaeta	0.135509	0.0166522	0.393584	0.00185591	0.0313502	0.172839	0.507528	0.0131986	0.285792	0.00425755	0.168198	2.35047
	OTU00042 | unknown_SJA-15(O)	2.11283	1.31553	0.0621449	0.144761	0.216601	0.0442146	0.492149	0.492119	0.0271321	0.119212	0.0321769	0.00719238
	OTU00043 | uncultured_Veillonellaceae(F)	0	0.0349697	0.053267	0	0.0256502	3.32949	0	0	0	0	0	0
	OTU00044 | Syner-01	0.00276549	0.0482915	0.0799006	0.0111354	0.0356252	2.65422	0.0107658	0.0131986	0.0307498	0.00851511	0.0190136	0.572514
	OTU00045 | Methanobacterium	0	0.00333045	0.0118371	0.00927954	0.159601	2.96506	0.00153796	0.0207406	0	0.00283837	0.0482654	0.159671
	OTU00046 | uncultured_Anaerolineaceae(F)	0.0497788	0.00666089	2.19283	0.193014	0.0584254	0.0576129	0.0507528	0.0245117	2.40933	0.157529	0.049728	0.0129463
	OTU00047 | unknown_Lentimicrobiaceae(F)	0.143805	0.151535	0.00591856	0.248692	0.798005	0.0120585	0.150721	0.0527943	0.00723524	0.322155	1.84725	0.00287695
	OTU00048 | unclassified_Bacteria(D)	0	0	0	0	0	0	0	0.00377102	0	0	3.59065	0
	OTU00049 | uncultured_Anaerolineae(C)	0.221239	0.0333045	2.15436	0.436138	0.501603	0.154081	0.190708	0.128215	0.506466	0.315059	0.257415	0.0388389
	OTU00050 | Aminiphilus	0	0.0133218	0.0325521	0	0.00712504	1.89721	0.00153796	0.0245117	0.00361762	0.00567674	0.00438776	1.17811
	OTU00051 | unknown_Latescibacteria(P)	0.149336	0.00999134	0.073982	2.58157	0.168151	0	0.00307593	0.0207406	0	0.789067	0.00438776	0.00575391
	OTU00052 | Syntrophomonas	0.0387168	0.0199827	0.00295928	0.0259827	0.0285002	0.00133984	2.58378	0.0263972	0.0361762	0.217135	0.204762	0.00863086
	OTU00053 | uncultured_Anaerolineaceae(F)	0.0940265	0.00166522	0.0828598	1.4142	0.166726	0	0	0.0471378	0	1.3312	0.024864	0.00719238
	OTU00054 | Ercella	0.481195	2.13482	0.0562263	0.189303	0.307802	0.0669918	0.0476769	0.0358247	0.00542643	0.00425755	0.00731294	0
	OTU00055 | CI75cm.2.12	0.0636062	0.279758	0.0651042	0.0445418	0.0456003	0.911088	0.0169176	0.126329	0.00361762	0.0170302	0.0277892	1.16085
	OTU00056 | Caldisericum	0.0608407	1.16399	0.00591856	0.00556772	0.0627004	0.16212	0	0.0999321	0	0.00141918	0.00877552	1.30901
	OTU00058 | Proteiniphilum	0.0248894	0	5.2468	0.0649568	0	0.0308162	0	0.00188551	0	0	0.00146259	0
	OTU00059 | unknown_SBR1031(O)	0.0110619	0.11157	0.00887784	0.261683	1.79979	0.0509138	0.0169176	0.0320537	0.0397938	0.0425755	0.29398	0.0100693
	OTU00060 | Syntrophomonas	0.0193584	0.044961	0.0384706	0.181879	0.487353	0.0227772	0.193784	0.113131	0.10672	0.377503	1.0984	0.0172617
	OTU00061 | Methanoregula	1.22235	0.0266436	0.00591856	0.0983631	0.00285002	0	1.12118	0.367675	0	0.327832	0.00292517	0.00143848
	OTU00062 | unknown_Bacteroidetes_vadinHA17(F)	0.0414823	0.551189	0.00295928	0.0278386	0.151051	0.0214374	0.299903	1.68188	0.00542643	0.00141918	0.0862926	0.00431543
	OTU00064 | uncultured_Acidaminococcaceae(F)	0.362279	2.08819	0.00591856	0.0129914	0.0698254	0.0375154	0.00307593	0.0697639	0	0	0	0
	OTU00065 | Clostridium_sensu_stricto_1	0.110619	0.0266436	0.0976562	1.96169	0.205201	0.00133984	0.00153796	0.0245117	0	0.19159	0.00731294	0.00431543
	OTU00070 | Smithella	0.14104	0.0266436	0.103575	1.72599	0.257927	0.00535934	0.0215315	0.00754205	0.00180881	0.100762	0.017551	0
	OTU00071 | unknown_C10-SB1A(O)	2.6604	0.156531	0.0769413	0.103931	0	0	0.203011	0	0.00361762	0	0	0
	OTU00075 | Syntrophus	0.271018	0.0183175	0.585938	1.22119	0.112576	0.0308162	0.0461389	0.00942756	0.0651171	0.112116	0.0102381	0.00719238
	OTU00077 | uncultured_Desulfobacteraceae(F)	0	0.00166522	0.00295928	0	0	0.016078	0	0.0320537	0	0.00993429	0.0234014	1.66863
	OTU00078 | Ercella	0.201881	0.392993	0.153883	1.27315	0.179551	0.0120585	0.00153796	0.00188551	0.0253233	0.00709592	0	0.00143848
	OTU00082 | Saccharofermentans	0.190819	1.60528	0.00295928	0.00556772	0.126826	0.0522536	0.0123037	0.0377102	0	0	0	0
	OTU00083 | Syntrophobacter	0.0636062	0	1.37902	0.0723804	0.00142501	0.0629723	0.041525	0.0414813	0.935154	0.0113535	0.0234014	0.00431543
	OTU00084 | Sulfurovum	0.0580752	0.0199827	0.142045	0.0668127	1.42643	0.0401951	0.00153796	0.00754205	0.00542643	0.00283837	0.00877552	0.00143848
	OTU00085 | uncultured_Rikenellaceae(F)	0	0.00166522	0.0828598	0.00556772	0.00427503	1.47248	0	0	0.0416026	0	0	0.0100693
	OTU00089 | unknown_Aminicenantales(O)	0.0497788	0	0.053267	1.04859	0.0840755	0	0.00307593	0.0490233	0	0.581866	0.0102381	0.00575391
	OTU00091 | uncultured_Anaerolineaceae(F)	0.0359513	0.0183175	1.30504	0.191158	0.0883506	0.0361756	0.0230695	0.00754205	0.62223	0.0553482	0.017551	0.0143848
	OTU00092 | Aquimonas	0	0.029974	0.0887784	0	0.0299252	1.31438	0	0.0207406	0.00180881	0.00851511	0.00585035	0.00575391
	OTU00093 | unknown_Hydrogenedensaceae(F)	0.00553097	0.0266436	0.100616	0.0352622	0.0513003	1.00622	0.00153796	0.0113131	0.0108529	0.0212878	0.00585035	0.192756
	OTU00097 | Methanoregula	0.00276549	0.014987	0	0.00927954	0	0.00133984	0.0322973	0.0301682	0	1.27443	0.00438776	0.00143848
	OTU00100 | Methanoculleus	0.00276549	0	0.363991	0.0631009	0.00142501	0.00669918	0	0	1.21371	0.0851511	0.00292517	0.00143848
	OTU00104 | unknown_Bacteroidetes_vadinHA17(F)	0.0608407	0	0.0266335	1.0059	0.0997506	0	0.0753603	0.0113131	0.00723524	0.19159	0.0365647	0
	OTU00105 | Methanobacterium	0	0	0	0	0	0	0	1.61965	0	0	0.00146259	0
	OTU00106 | Terrisporobacter	0.0857301	0	0.0710227	1.21562	0.146776	0	0.00461389	0.00188551	0	0.0454139	0.00585035	0.00719238
	OTU00111 | unknown_SBR1031(O)	1.70354	0.081596	0.0769413	0.0742363	0.00285002	0	0.136879	0	0.00723524	0	0	0
	OTU00113 | unknown_Woesearchaeia(C)	0	0.00166522	0.12429	0.295089	0	0	0	0	1.07081	0.0397372	0.00292517	0
	OTU00119 | unknown_Lentimicrobiaceae(F)	0	0.081596	0	0	0.00285002	0.00133984	0.00307593	1.24821	0.00180881	0.00709592	0	0.00287695
	OTU00124 | unknown_Limnochordaceae(F)	0	0	0	0	0	0	0.044601	0	1.20648	0	0.00146259	0
	OTU00137 | unclassified_Izimaplasmatales(O)	0	0	0	0	0	0	0.00307593	0	1.05996	0	0	0
	OTU00167 | unknown_RBG-13-54-9(O)	1.00664	0.0632785	0.0355114	0.0371181	0	0	0.00307593	0	0	0	0	0

## Sheet: Table S5
	Table S5: A list of unique propionate-degrading microbes enriched from different anaerobic sludge sources
	OTU	Kingdom	Phylum	Class	Order	Family	Genus	Enriched-culture Samples
	OTU00020	Bacteria	Firmicutes	Clostridia	Clostridiales	Peptococcaceae	Cryptanaerobacter	Domestic
	OTU00026	Bacteria	Chloroflexi	Anaerolineae	1-20_or	1-20_fa	1-20_ge	Domestic
	OTU00033	Bacteria	Acidobacteria	Aminicenantia	Aminicenantales	Aminicenantales_fa	Aminicenantales_ge	Domestic
	OTU00052	Bacteria	Firmicutes	Clostridia	Clostridiales	Syntrophomonadaceae	Syntrophomonas	Domestic
	OTU00061	Archaea	Euryarchaeota	Methanomicrobia	Methanomicrobiales	Methanoregulaceae	Methanoregula	Domestic
	OTU00013	Bacteria	Synergistetes	Synergistia	Synergistales	Synergistaceae	JGI-0000079-D21	FruitJuice
	OTU00017	Bacteria	Synergistetes	Synergistia	Synergistales	Synergistaceae	JGI-0000079-D21	FruitJuice
	OTU00023	Archaea	Euryarchaeota	Methanobacteria	Methanobacteriales	Methanobacteriaceae	Methanobacterium	FruitJuice
	OTU00027	Bacteria	Acidobacteria	Aminicenantia	Aminicenantales	Aminicenantales_fa	Aminicenantales_ge	FruitJuice
	OTU00035	Bacteria	Firmicutes	Clostridia	DTU014	DTU014_fa	DTU014_ge	FruitJuice
	OTU00062	Bacteria	Bacteroidetes	Bacteroidia	Bacteroidales	Bacteroidetes_vadinHA17	Bacteroidetes_vadinHA17_ge	FruitJuice
	OTU00105	Archaea	Euryarchaeota	Methanobacteria	Methanobacteriales	Methanobacteriaceae	Methanobacterium	FruitJuice
	OTU00119	Bacteria	Bacteroidetes	Bacteroidia	Sphingobacteriales	Lentimicrobiaceae	Lentimicrobiaceae_ge	FruitJuice
	OTU00004	Bacteria	Chloroflexi	Anaerolineae	Anaerolineales	Anaerolineaceae	uncultured	PalmOil
	OTU00014	Bacteria	Chloroflexi	Anaerolineae	Anaerolineales	Anaerolineaceae	uncultured	PalmOil
	OTU00024	Bacteria	Bacteroidetes	Bacteroidia	Bacteroidales	Bacteroidetes_vadinHA17	Bacteroidetes_vadinHA17_ge	PalmOil
	OTU00032	Bacteria	Bacteroidetes	Bacteroidia	Bacteroidales	Bacteroidetes_vadinHA17	Bacteroidetes_vadinHA17_ge	PalmOil
	OTU00046	Bacteria	Chloroflexi	Anaerolineae	Anaerolineales	Anaerolineaceae	uncultured	PalmOil
	OTU00100	Archaea	Euryarchaeota	Methanomicrobia	Methanomicrobiales	Methanomicrobiaceae	Methanoculleus	PalmOil
	OTU00113	Archaea	Nanoarchaeaeota	Woesearchaeia	Woesearchaeia_or	Woesearchaeia_fa	Woesearchaeia_ge	PalmOil
	OTU00124	Bacteria	Firmicutes	Limnochordia	Limnochordales	Limnochordaceae	Limnochordaceae_ge	PalmOil
	OTU00137	Bacteria	Tenericutes	Mollicutes	Izimaplasmatales	Izimaplasmatales_unclassified	Izimaplasmatales_unclassified	PalmOil
	OTU00036	Archaea	Euryarchaeota	Methanomicrobia	Methanomicrobiales	Methanoregulaceae	Methanoregula	PigManure
	OTU00053	Bacteria	Chloroflexi	Anaerolineae	Anaerolineales	Anaerolineaceae	uncultured	PigManure
	OTU00097	Archaea	Euryarchaeota	Methanomicrobia	Methanomicrobiales	Methanoregulaceae	Methanoregula	PigManure
	OTU00009	Bacteria	Chloroflexi	Anaerolineae	uncultured	uncultured_fa	uncultured_ge	Starch
	OTU00015	Archaea	Euryarchaeota	Methanomicrobia	Methanomicrobiales	Methanoregulaceae	Methanolinea	Starch
	OTU00028	Bacteria	Chloroflexi	Anaerolineae	uncultured	uncultured_fa	uncultured_ge	Starch
	OTU00047	Bacteria	Bacteroidetes	Bacteroidia	Sphingobacteriales	Lentimicrobiaceae	Lentimicrobiaceae_ge	Starch
	OTU00048	Bacteria	Bacteria_unclassified	Bacteria_unclassified	Bacteria_unclassified	Bacteria_unclassified	Bacteria_unclassified	Starch
	OTU00060	Bacteria	Firmicutes	Clostridia	Clostridiales	Syntrophomonadaceae	Syntrophomonas	Starch

## Sheet: Table S6
	Table S6: A list of SILVA-annotated-uncultured microbes found dominantly (greater than 1% relative abundance) in the propionate-degrading cultures
	OTU	Taxonomic Information		Observed Sample
		Family	Genus
	OTU00014	Anaerolineaceae	Anaerolineaceae_uncultured	PalmOil
	OTU00046	Anaerolineaceae	Anaerolineaceae_uncultured	PalmOil
	OTU00004	Anaerolineaceae	Anaerolineaceae_uncultured	Seafood, PalmOil
	OTU00077	Desulfobacteraceae	Desulfobacteraceae_uncultured	Seafood
	OTU00053	Anaerolineaceae	Anaerolineaceae_uncultured	PigManure
	OTU00028	Anaerolinea_uncultured	Anaerolinea_uncultured	Starch
	OTU00009	Anaerolinea_uncultured	Anaerolinea_uncultured	Starch

## Sheet: Table S7
	Table S7: Percent relative abundance of uncultured microbes found in the inoculum and propionate-degrading cultures using the culture-independent amplicon-based sequencing approach
	Sample	Inoculum (%)	Enriched culture (%)
	Domestic	12.72	5.5
	FruitJuice	11.11	3.17
	PalmOil	14.51	15.34
	PigManure	7.47	4.14
	Seafood	39.29	21.89
	Starch	5.67	3.34

## Sheet: Table S8
	Table S8: Reactions of syntrophic metabolism of obligate proton-reducing acetogens and methanogens [19,25]
	Reactions	ΔG°′ (kJ/mol)
	*Propionate− + 3H2O → acetate− + HCO3− + H+ + 3H2	76.1
	Butyrate− + 2H2O → 2acetate− + H+ + 2H2	48.6
	Acetate−→ HCO3− + H+ + CH4	−36.0
	4H2 + HCO3− + H+ → CH4 + 3H2O	−135.6
	**2Propionate− + 2H2O → 3acetate− + H+ + 2H2	48.4
	* represents Methylmalonyl Co-A (MMC) or classical propionate-degrading pathway [19]
	** represents alternative propionate-degrading pathway (dismutation pathways) [25]

## Sheet: Table S9
	Table S9: Relative abundance of dominant methanogens found in the inoculum and propionate-degrading cultures and percentage HM:AM ratios
		Inoculum						Enriched culture
	otu|tax	Domestic	FruitJuice	PalmOil	PigManure	Starch	Seafood	Domestic	FruitJuice	PalmOil	PigManure	Starch	Seafood
	OTU00001 | Methanosaeta	5.83794	4.8891	0.106534	19.1622	7.03954	1.10938	15.4565	9.89705	5.88948	37.9902	21.4137	2.43246
	OTU00003 | Methanosaeta	0.912611	7.51682	7.74444	1.70743	2.71179	4.82609	8.21273	3.6956	3.89617	0.280999	5.21266	0.598406
	OTU00041 | Methanosaeta	0.135509	0.0166522	0.393584	0.00185591	0.0313502	0.172839	0.507528	0.0131986	0.285792	0.00425755	0.168198	2.35047
	Total AM	6.88606	12.4226	8.24455	20.8715	9.78269	6.10831	24.1768	13.6059	10.0714	38.2754	26.7946	5.38134
	OTU00015 | Methanolinea	0.301438	1.17232	0.0621449	0.456553	3.6124	0.00937885	0.198397	0.126329	0.206204	0.245519	4.73293	0.00143848
	OTU00018 | Methanolinea	0.829646	0.358023	4.44188	3.70254	0.102601	0.0174179	0.186094	0.122558	1.3349	2.04079	0.179898	0.00719238
	OTU00025 | Methanospirillum	0.00276549	0.00832612	0.130208	0.0111354	0.00427503	3.29064	0.24915	0.00754205	0.0198969	0.19159	0.00731294	2.6842
	OTU00036 | Methanoregula	0.738385	2.48784	0	0.257971	0.0741005	0.00267967	0.0599806	0.10936	0	1.13677	0.08483	0
	OTU00061 | Methanoregula	1.22235	0.0266436	0.00591856	0.0983631	0.00285002	0	1.12118	0.367675	0	0.327832	0.00292517	0.00143848
	OTU00097 | Methanoregula	0.00276549	0.014987	0	0.00927954	0	0.00133984	0.0322973	0.0301682	0	1.27443	0.00438776	0.00143848
	OTU00100 | Methanoculleus	0.00276549	0	0.363991	0.0631009	0.00142501	0.00669918	0	0	1.21371	0.0851511	0.00292517	0.00143848
	OTU00023 | Methanobacterium	0.0138274	0.761007	0	0.0185591	0.410403	0.0107187	0.725919	4.47809	0.0416026	0.300867	2.52296	0.00719238
	OTU00034 | Methanobacterium	0.00276549	0.00832612	0.073982	0.00185591	0	2.65422	0.00153796	0.262086	0.00723524	0	0.00146259	1.23421
	OTU00045 | Methanobacterium	0	0.00333045	0.0118371	0.00927954	0.159601	2.96506	0.00153796	0.0207406	0	0.00283837	0.0482654	0.159671
	OTU00105 | Methanobacterium	0	0	0	0	0	0	0	1.61965	0	0	0.00146259	0
	Total HMs	3.1167	4.8408	5.08996	4.62863	4.36765	8.95814	2.57609	7.1442	2.82355	5.60578	7.58936	4.09822
	HM : AM Ratio	31.16 : 68.84	28.04 : 71.96	38.17 : 61.83	18.15 : 81.85	30.87 : 60.13	40.54 : 59.46	9.63 : 90.37	34.43 : 65.57	21.90 : 78.10	12.77: 87.23	22.07 : 77.93	43.23 : 56.77
